# Supplementary material for: SPHIRE-crYOLO is a fast and accurate fully automated particle picker for cryo-EM
Source: PubMed Central journal article supplement (PMC6584505; doi:10.1038/s42003-019-0437-z), 2019-06-19
Supplement: 42003_2019_437_MOESM1_ESM.pdf [file 42003_2019_437_MOESM1_ESM.pdf]

## Description of Additional Supplementary Files

**File Name:** Supplementary Data 1

**Description:** Precision / recall values in crYOLO evaluated on KLH in dependence of the number of training images. First column lists recall values, second column precision values.

**File Name:** Supplementary Data 2

**Description:** AUC, recall and precision values for the general training dataset (without simulated data). The values were evaluated with the crYOLO network (column 1-3) and Inception-ResNet (column 4-6).

**File Name:** Supplementary Data 3

**Description:** Precision / recall values in crYOLO evaluated on TcdA1 picking with a directly trained model or the general model. First column lists recall values, second column precision values.
